# Supplementary material
Source: Springer Nature journal article supplement (https://www.springermedizin.de/resource/supplementary/13063_2009_373_MOESM6_ESM.pdf/9618092)
Supplement: MOESM6 [file 9618092]

**Independent data security and monitoring committee**

1 Trial Coordinator

**Intervention**

***ALARM/SOGC Committee\****

1 ALARM Committee chairman

1 Program coordinator

6 Certified instructors

***ALARM Committee - Senegal***

3 National instructors

1 Facilitator (one of the above)

***ALARM Committee - Mali***

3 National instructors

1 Facilitator (one of the above)

***Local audit committee (hospital)***

23 Local opinion leaders

23 Collectors of information on maternal deaths

**Evaluation**

***Coordination Centre - Senegal***

1 National coordinator for collection of clinical and organizational data

24 Clinical data collectors (one per centre)

2 Data entry operators

1 Collector of satisfaction data

***Coordination Centre - Mali***

2 National coordinators for collection of clinical and organizational data

22 Clinical data collectors (one per centre)

2 Data entry operators (duplicate entries)

1 Collector of satisfaction data

***Trial Coordination Centre - Canada***

1 Data Manager

1 Coordinator for the satisfaction survey + research assistants

1 Coordinator for the economic evaluation + research assistants
